# Supplementary material for: Nuclear-targeted carbon quantum dot mediated CRISPR/Cas9 delivery for fluorescence visualization and efficient editing
Source: Royal Society of Chemistry journal article supplement (doi:10.1039/d2nr04281a), 2022-01-01
Supplement: d2nr04281a1.pdf [file d2nr04281a1.pdf]

## Supplementary information

### Nuclear-Targeted Carbon Quantum Dots Mediated CRISPR/Cas9 Delivery for Fluorescence Visualization and Efficient Editing

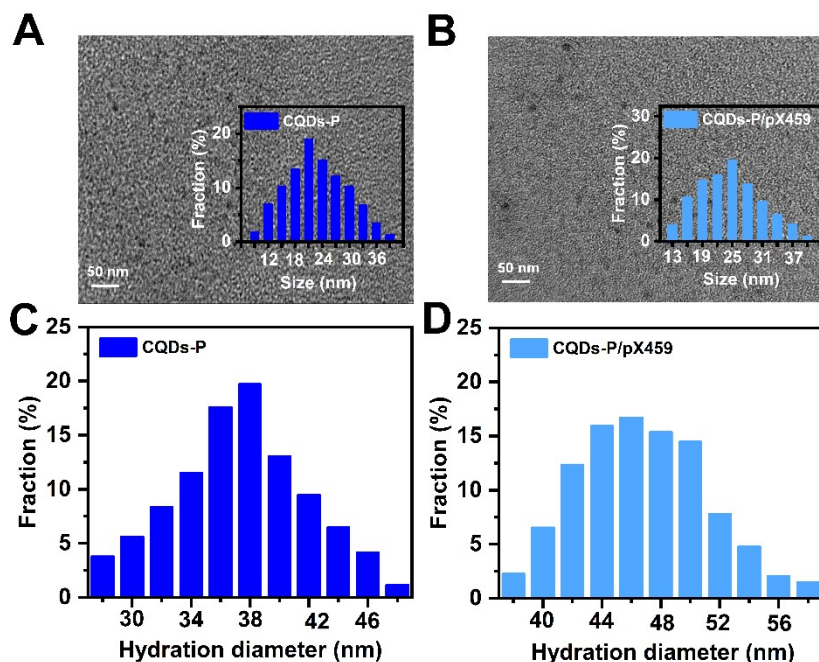

**Fig. S1** TEM image of (A) CQDs-PP/pX459 and (B) CQDs-P/pX459. The insets show corresponding histograms were obtained by statistical analysis of 100 particles randomly selected from the TEM images using the ImageJ software. Hydration diameter distribution histogram of (C) CQDs-P and (D) CQDs-P/pX459.

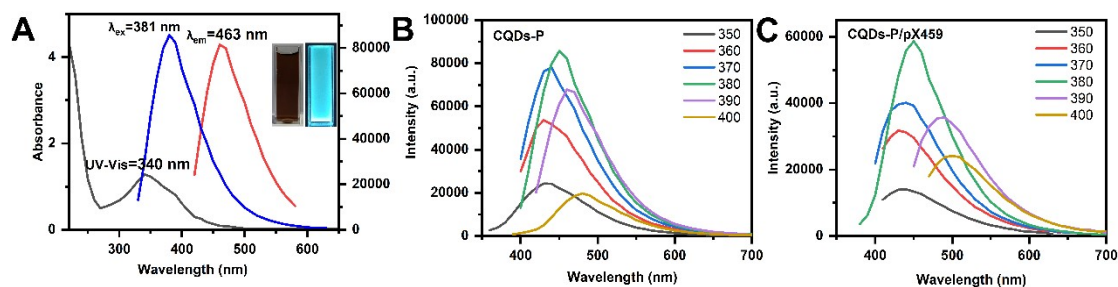

**Fig. S2** Optical properties of CQDs-P. (A) Normalized UV-vis, excitation and emission spectra of CQDs-P. The inset shows the CQDs-P aqueous solution under ambient light and 365 nm UV lamp. Excitation-dependent emission spectra of (B) CQDs-P and (C) CQDs-P/pX459 with the weight ratio of 20:1.

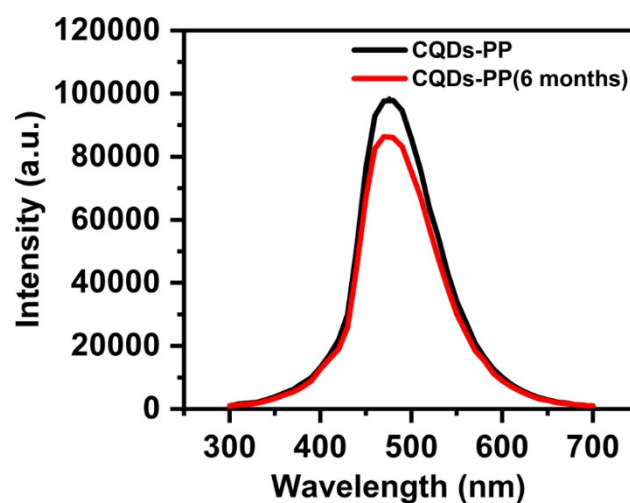

**Fig. S3** Emission spectra of fresh CQDs-PP and CQDs-PP (keeping in 4 °C for 6 months) using excitation wavelength of 390 nm.

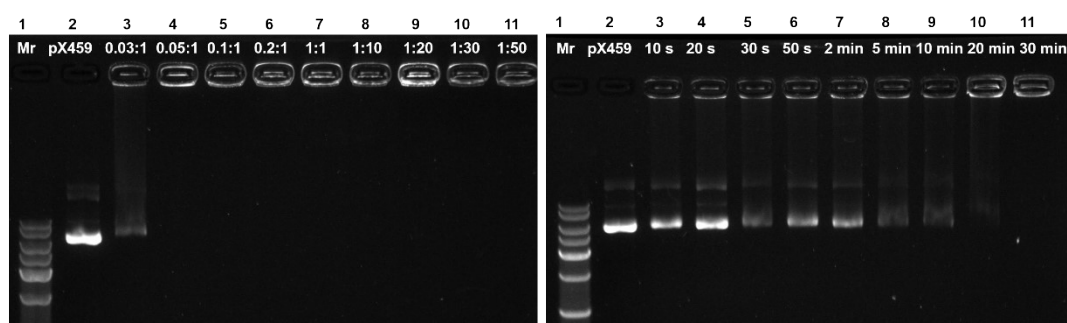

**Fig. S4.** Agarose gel electrophoresis of (A) CQDs-P/pX459 complexes with different weight ratios of CQDs-P to pX459 and (B) Lipo2000/pX459 with the weight ratio of 2:1 at different recombination times. Mr: DNA Marker

**Table. S1** Effects of inhibitors on cellular uptake.

| Inhibitor          | Effect                                                                              |
|--------------------|-------------------------------------------------------------------------------------|
| NH <sub>4</sub> Cl | Interfere with the transport of acidic endosomes and lysosomes.                     |
| Glucose            | Inhibition of clathrin dependent endocytosis                                        |
| Genistein          | Inhibition of caveolae mediated endocytosis                                         |
| Colchicine         | Inhibition of microtubule dependent active transport                                |
| Filipin III        | Blocking caveolae mediated endocytosis                                              |
| SOV                | Blocking cytoskeleton motor-mediated transport                                      |
| DMA                | Interfere with Na <sup>+</sup> / H <sup>+</sup> exchange dependent macropinocytosis |

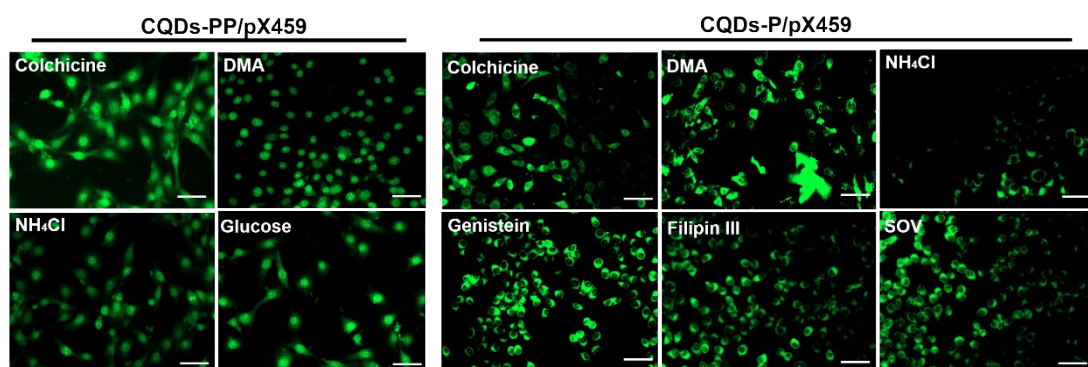

**Fig. S5** The effects of various inhibitors on cellular uptake of CQDs-PP/pX459 and CQDs-P/pX459 complexes. Fluorescent images of cells treated with inhibitors before transfection with CQDs/pX459 complexes. Scale bars = 100  $\mu$ m.

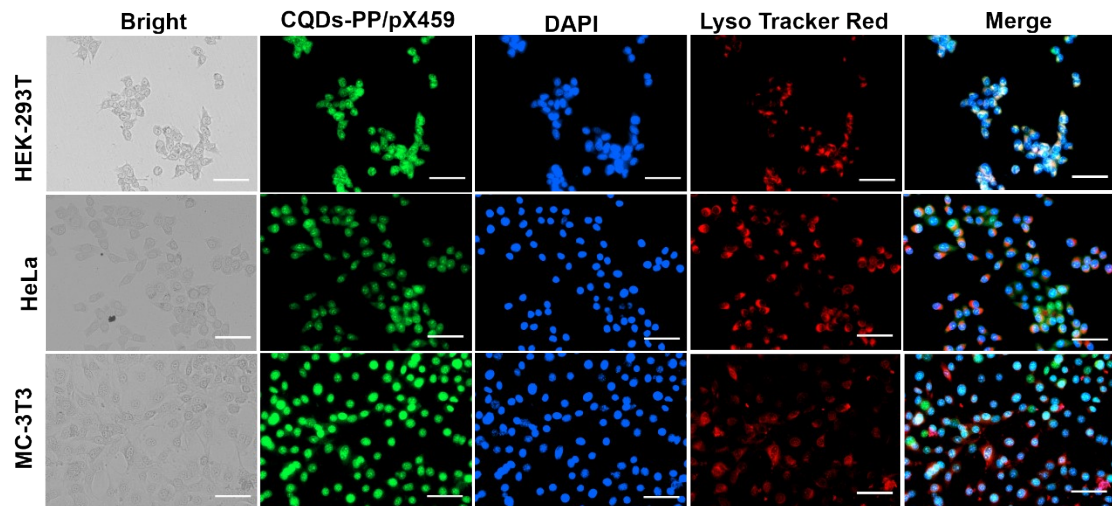

**Fig. S6** Fluorescent images of HEK-293T, HeLa and MC-3T3 cells transfected with CQDs-PP/pX459 at 45 min post-transfection. Scale bars =100  $\mu$ m.

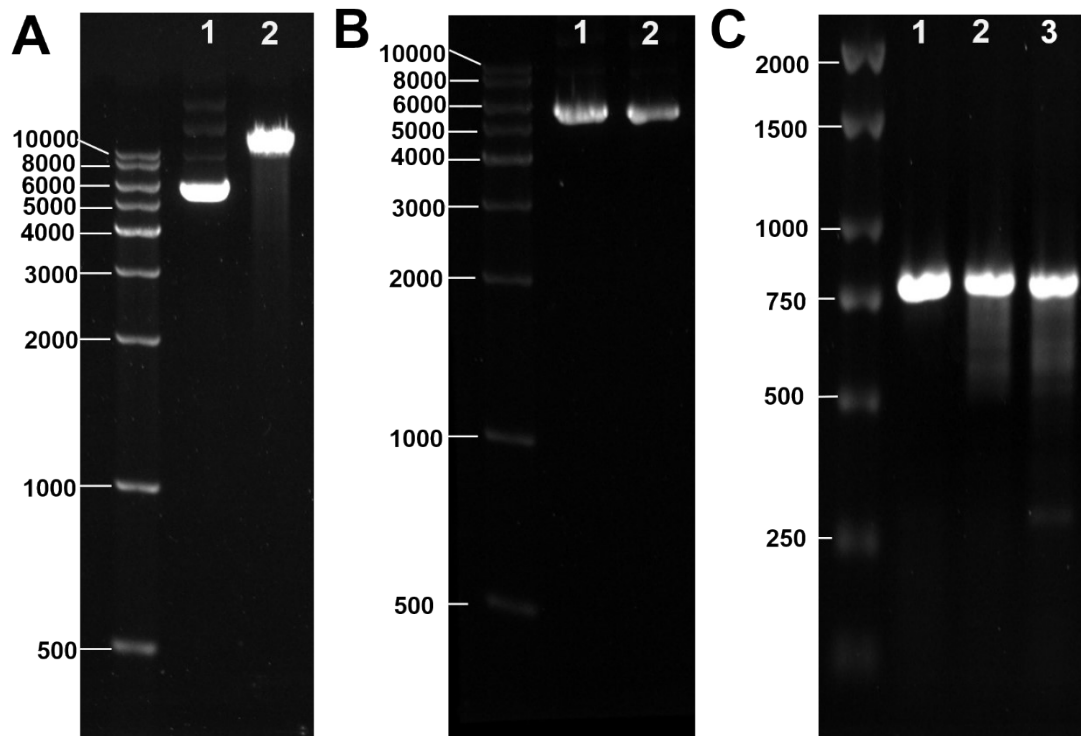

**Fig. S7** Agarose gel electrophoresis of (A) supercoiled (lane 1) and linearized (lane 2) pX459, (B) supercoiled pX459 (lane 1) and supercoiled pX459-EFHD1-sgRNA(lane 2). (C) PCR amplification bands of the EFHD1 gene from genomic DNA of CQDs-PP (lane 1), Lipo2000 (lane 2) and CQDs-P (lane 3) transfected cells.
